# Supplementary material
Source: Springer Nature journal article supplement (https://www.springermedizin.de/resource/supplementary/12974_2006_72_MOESM2_ESM.pdf/9600714)

TO subgroup strains

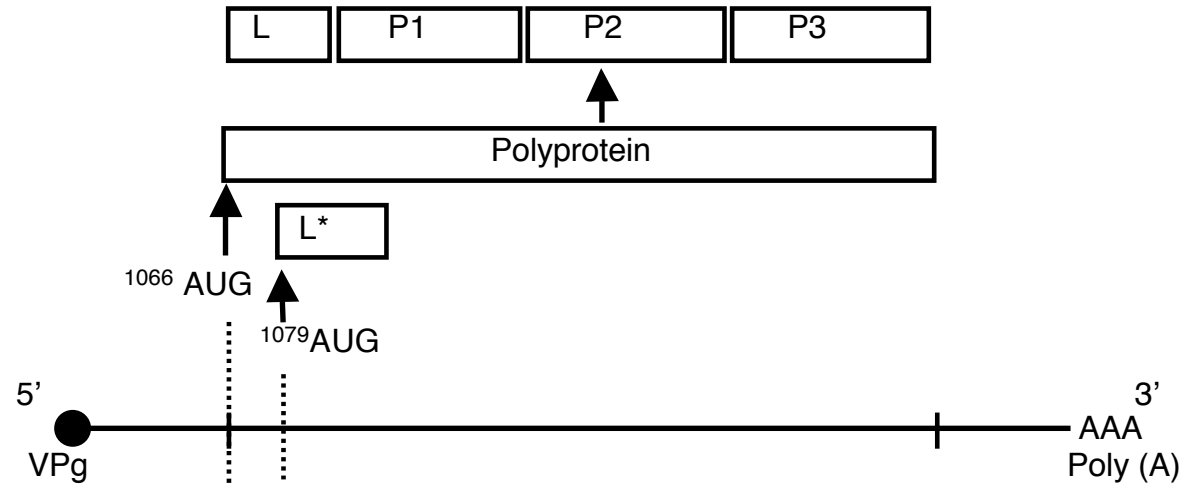

GDVII subgroup strains  
DAL\*-1 virus

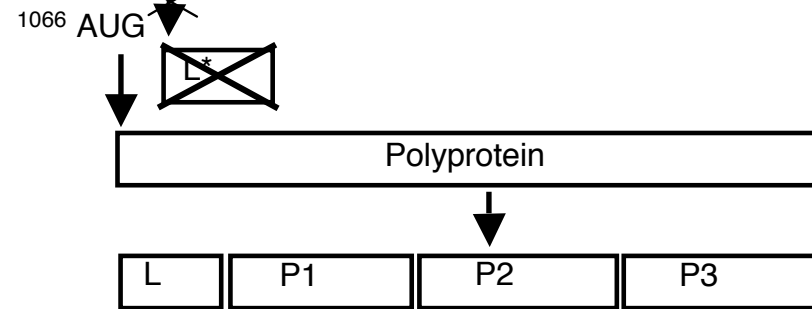

Supplement: MOESM2 [file 9600714]
